# Supplementary material for: Clinical Response to Personalized Exercise Therapy in Heart Failure Patients with Reduced Ejection Fraction Is Accompanied by Skeletal Muscle Histological Alterations
Source: MDPI journal article supplement (doi:10.3390/ijms20215514), 2019-11-05
Supplement: s1 [file s1]

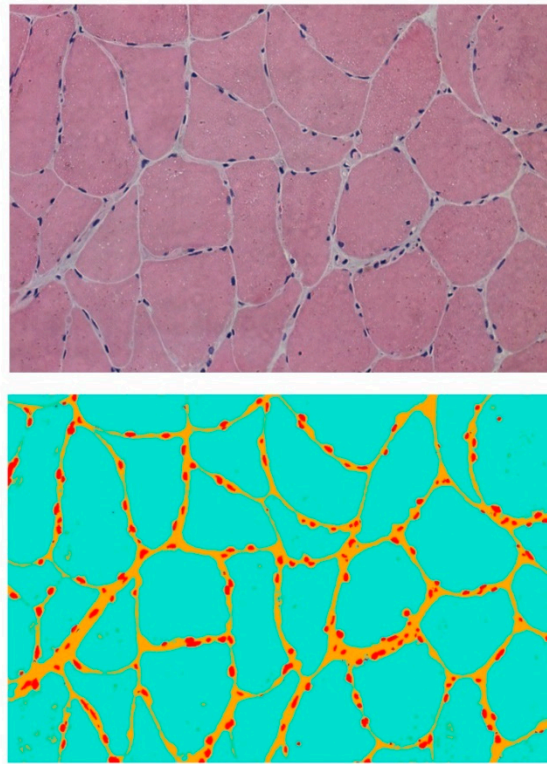

Figure S1. The example of image segmentation for further analysis prepared using ZEN Intellesis module with deep learning platform.

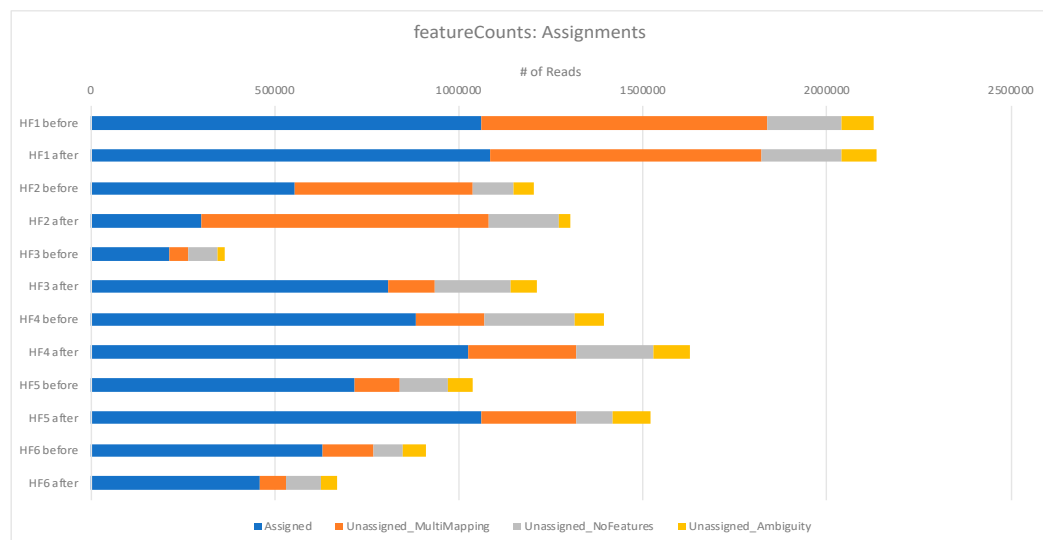

Figure S2: First six patients HF1-HF6 were processed for sequencing. However, HF3 and HF6 samples did not reach sufficient library depth, while HF2 had a low gene assignment rate for the reads
